# Supplementary material
Source: publisher figshare collection journal article supplement (https://frontiersin.figshare.com/ndownloader/files/31653521)
Supplement: Supplementary file 1 [file 31653521]

**Supplementary table 4. Disease awareness variables stratified by cassava infection**

| **Variables** | **Total,**  **n (%)** | **CBSVs Positive,**  **n (%)** | **Chi square value** | **df** | **p value*** |
| --- | --- | --- | --- | --- | --- |
| **Knowledge of cassava viral diseases** | | |  |  |  |
| CMD | 69 (53.1) | 26 (56.5) | 0.79 | 2 | 0.673 |
| CBSD | 15 (11.5) | 6 (13.1) |  |  |  |
| Both CMD & CBSD | 46 (35.4) | 14 (30.4) |  |  |  |
| **Knowledge of cassava viral diseases transmission** | | | |  |  |
| Yes | 70 (53.8) | 16 (34.8) | 19.62 | 1 | **<0.001** |
| No | 60 (46.2) | 30 (65.2) |  |  |  |
| **Knowledge of mode of transmission** | | |  |  |  |
| Infected cutting | 53 (40.8) | 13 (28.2) | 5.24 | 2 | 0.073 |
| Both whitefly & infected cutting | 17 (13.0) | 3 (6.5) |  |  |  |
| None | 60 (46.2) | 30 (65.2) |  |  |  |
| **Type of known symptoms** | |  |  |  |  |
| CMD Leaf symptoms | 41 (31.5) | 14 (30.4) | 1.41 | 4 | 0.843 |
| CBSD leaf symptoms | 4 (3.1) | 2 (4.3) |  |  |  |
| CBSD roots symptom | 13 (10.0) | 3 (6.5) |  |  |  |
| CMD & CBSD roots symptoms | 27 (20.8) | 10 (21.7) |  |  |  |
| None | 45 (34.6) | 17 (37.0) |  |  |  |
| **Observed viral diseases and pests in the field** | | |  |  |  |
| CMD | 23 (17.7) | 11 (24.0) | 5 | 5 | 0.417 |
| CBSD | 21 (16.2) | 9 (19.6) |  |  |  |
| Green mites | 1 (0.8) | 0 (0.0) |  |  |  |
| White fly | 12 (9.2) | 2 (4.3) |  |  |  |
| Both CBSD & CMD | 7 (5.4) | 3 (6.5) |  |  |  |
| None | 66 (50.8) | 21 (45.6) |  |  |  |
| **Knowledge of cassava viral diseases management** | | | |  |  |
| Yes | 65 (50.0) | 15 (31.3) | 19.38 | 1 | **<0.001** |
| No | 65 (50.0) | 31 (67.4) |  |  |  |
| * Significant at p<0.05 bolded; df: degree of freedom | | | | | |
